# Supplementary material
Source: publisher site journal article supplement (https://www.dovepress.com/article/525568)
Supplement: Supplementary file 1 [file 525568_Supplementary%20Material.pdf]

**Supplementary table 1** The raw data of flow cytometry experiment for cellular uptake of RB, PEG-PCL@RB and TPP-PEG-PCL@RB

| Control | RB     | TPP-PEG-PCL@RB | PEG-PCL@RB |
|---------|--------|----------------|------------|
| 2776    | 296526 | 200647         | 170565     |
| 2766    | 280477 | 214438         | 135055     |
|         | 278772 | 215166         | 103289     |
|         | 313669 | 250817         |            |
|         | 308604 |                |            |

**Supplementary table 2** The raw data of mitochondria-targeting analysis by of NR, PEG-PCL@NR and TPP-PEG-PCL@NR groups.

| Distance_ ( | Gray_Value | Distance_ ( | Gray_Value |        |
|-------------|------------|-------------|------------|--------|
| 0           | 4          | 0           | 9          |        |
| 1           | 2.854      | 0.078125    | 1          | 8.577  |
| 2           | 3.428      | 0.15625     | 2          | 6.643  |
| 3           | 2.809      | 0.234375    | 3          | 7.698  |
| 4           | 4.64       | 0.3125      | 4          | 8.201  |
| 5           | 2.42       | 0.390625    | 5          | 9.835  |
| 6           | 4.068      | 0.46875     | 6          | 8.823  |
| 7           | 3.476      | 0.546875    | 7          | 9.127  |
| 8           | 2.278      | 0.625       | 8          | 8.831  |
| 9           | 2.22       | 0.703125    | 9          | 7.723  |
| 10          | 1.288      | 0.78125     | 10         | 7.33   |
| 11          | 0.951      | 0.859375    | 11         | 9.391  |
| 12          | 0.953      | 0.9375      | 12         | 10.008 |
| 13          | 0.179      | 1.015625    | 13         | 9.322  |
| 14          | 0          | 1.09375     | 14         | 8.856  |
| 15          | 0.024      | 1.171875    | 15         | 5.258  |
| 16          | 0          | 1.25        | 16         | 7.199  |
| 17          | 0.013      | 1.328125    | 17         | 7.971  |
| 18          | 0.255      | 1.40625     | 18         | 5.851  |
| 19          | 0.057      | 1.484375    | 19         | 4.079  |
| 20          | 0.618      | 1.5625      | 20         | 5.363  |
| 21          | 0.014      | 1.640625    | 21         | 4.033  |
| 22          | 0          | 1.71875     | 22         | 4.413  |
| 23          | 0          | 1.796875    | 23         | 4.013  |
| 24          | 0          | 1.875       | 24         | 3.771  |
| 25          | 0          | 1.953125    | 25         | 4.251  |
| 26          | 0          | 2.03125     | 26         | 4.284  |
| 27          | 0          | 2.109375    | 27         | 4.975  |
| 28          | 0.16       | 2.1875      | 28         | 6.35   |
| 29          | 0.016      | 2.265625    | 29         | 5.58   |
| 30          | 0          | 2.34375     | 30         | 5.919  |
| 31          | 0.051      | 2.421875    | 31         | 4.975  |
| 32          | 0.182      | 2.5         | 32         | 6.199  |
| 33          | 0          | 2.578125    | 33         | 7.23   |
| 34          | 0          | 2.65625     | 34         | 7.467  |
| 35          | 0          | 2.734375    | 35         | 5.851  |
| 36          | 0          | 2.8125      | 36         | 6.817  |
| 37          | 0          | 2.890625    | 37         | 6.502  |
| 38          | 0          | 2.96875     | 38         | 7.047  |
| 39          | 0          | 3.046875    | 39         | 6.787  |
| 40          | 0          | 3.125       | 40         | 6.49   |
| 41          | 0          | 3.203125    | 41         | 4.98   |
| 42          | 0          | 3.28125     | 42         | 7.514  |
| 43          | 0          | 3.359375    | 43         | 8.752  |
| 44          | 0.482      | 3.4375      | 44         | 8.791  |
| 45          | 0.574      | 3.515625    | 45         | 7.574  |
| 46          | 0.01       | 3.59375     | 46         | 7.008  |
| 47          | 0          | 3.671875    | 47         | 6.4    |
| 48          | 0.331      | 3.75        | 48         | 6.108  |
| 49          | 0.297      | 3.828125    | 49         | 6.617  |
| 50          | 0          | 3.90625     | 50         | 6.621  |
| 51          | 0.234      | 3.984375    | 51         | 8.204  |
| 52          | 1.471      | 4.0625      | 52         | 7.73   |

|     |         |          |     |         |
|-----|---------|----------|-----|---------|
| 53  | 0.366   | 4.140625 | 53  | 10.135  |
| 54  | 0.901   | 4.21875  | 54  | 10.015  |
| 55  | 1.158   | 4.296875 | 55  | 9.577   |
| 56  | 1.277   | 4.375    | 56  | 12.272  |
| 57  | 1.523   | 4.453125 | 57  | 14.217  |
| 58  | 1.894   | 4.53125  | 58  | 12.726  |
| 59  | 2.454   | 4.609375 | 59  | 14.781  |
| 60  | 2.761   | 4.6875   | 60  | 13.666  |
| 61  | 1.505   | 4.765625 | 61  | 15.429  |
| 62  | 2.304   | 4.84375  | 62  | 16.296  |
| 63  | 1.131   | 4.921875 | 63  | 16.802  |
| 64  | 3.506   | 5        | 64  | 18.476  |
| 65  | 2.1     | 5.078125 | 65  | 17.96   |
| 66  | 1.031   | 5.15625  | 66  | 23.806  |
| 67  | 2.509   | 5.234375 | 67  | 25.063  |
| 68  | 2.153   | 5.3125   | 68  | 20.242  |
| 69  | 4.345   | 5.390625 | 69  | 25.986  |
| 70  | 4.915   | 5.46875  | 70  | 28.451  |
| 71  | 4.289   | 5.546875 | 71  | 30.312  |
| 72  | 5.047   | 5.625    | 72  | 34.825  |
| 73  | 8.546   | 5.703125 | 73  | 41.26   |
| 74  | 9.407   | 5.78125  | 74  | 45.855  |
| 75  | 13.02   | 5.859375 | 75  | 58.307  |
| 76  | 14.187  | 5.9375   | 76  | 87.812  |
| 77  | 12.854  | 6.015625 | 77  | 89.021  |
| 78  | 8.48    | 6.09375  | 78  | 82.174  |
| 79  | 16.465  | 6.171875 | 79  | 88.373  |
| 80  | 17.921  | 6.25     | 80  | 83.655  |
| 81  | 12.522  | 6.328125 | 81  | 82.631  |
| 82  | 10.48   | 6.40625  | 82  | 77.838  |
| 83  | 13.54   | 6.484375 | 83  | 75.751  |
| 84  | 9.603   | 6.5625   | 84  | 74.461  |
| 85  | 7.77    | 6.640625 | 85  | 82.366  |
| 86  | 22.833  | 6.71875  | 86  | 102.897 |
| 87  | 35.273  | 6.796875 | 87  | 114.71  |
| 88  | 49.01   | 6.875    | 88  | 132.008 |
| 89  | 50.671  | 6.953125 | 89  | 132.356 |
| 90  | 43.684  | 7.03125  | 90  | 137.106 |
| 91  | 60.761  | 7.109375 | 91  | 142.843 |
| 92  | 55.408  | 7.1875   | 92  | 152.454 |
| 93  | 57.718  | 7.265625 | 93  | 147.685 |
| 94  | 65.6    | 7.34375  | 94  | 164     |
| 95  | 53.351  | 7.421875 | 95  | 155.813 |
| 96  | 65.428  | 7.5      | 96  | 173.578 |
| 97  | 101.391 | 7.578125 | 97  | 193.097 |
| 98  | 108.509 | 7.65625  | 98  | 188.252 |
| 99  | 124.992 | 7.734375 | 99  | 184.07  |
| 100 | 187.362 | 7.8125   | 100 | 191.39  |
| 101 | 234.084 | 7.890625 | 101 | 186.399 |
| 102 | 251.132 | 7.96875  | 102 | 180.144 |
| 103 | 242.895 | 8.046875 | 103 | 178.59  |
| 104 | 252.237 | 8.125    | 104 | 171.351 |
| 105 | 244.353 | 8.203125 | 105 | 152.285 |
| 106 | 239.593 | 8.28125  | 106 | 142.124 |
| 107 | 192.961 | 8.359375 | 107 | 127.379 |
| 108 | 160.672 | 8.4375   | 108 | 119.933 |
| 109 | 107.494 | 8.515625 | 109 | 114.116 |
| 110 | 69.017  | 8.59375  | 110 | 105.466 |

|     |        |          |     |         |
|-----|--------|----------|-----|---------|
| 111 | 38.65  | 8.671875 | 111 | 118.035 |
| 112 | 34.263 | 8.75     | 112 | 120.151 |
| 113 | 37.93  | 8.828125 | 113 | 123.299 |
| 114 | 45.601 | 8.90625  | 114 | 127.772 |
| 115 | 29.951 | 8.984375 | 115 | 135.993 |
| 116 | 38.205 | 9.0625   | 116 | 130.685 |
| 117 | 25.595 | 9.140625 | 117 | 119.28  |
| 118 | 23.268 | 9.21875  | 118 | 113.333 |
| 119 | 27.19  | 9.296875 | 119 | 106.244 |
| 120 | 21.864 | 9.375    | 120 | 92.237  |
| 121 | 22.073 | 9.453125 | 121 | 77.954  |
| 122 | 13.817 | 9.53125  | 122 | 66.911  |
| 123 | 9.788  | 9.609375 | 123 | 59.815  |
| 124 | 10.434 | 9.6875   | 124 | 50.606  |
| 125 | 11.564 | 9.765625 | 125 | 38.547  |
| 126 | 18.688 | 9.84375  | 126 | 41.438  |
| 127 | 10.829 | 9.921875 | 127 | 39.763  |
| 128 | 9.993  | 10       | 128 | 36.687  |
| 129 | 7.322  | 10.07813 | 129 | 34.984  |
| 130 | 6.198  | 10.15625 | 130 | 34.129  |
| 131 | 5.164  | 10.23438 | 131 | 36.153  |
| 132 | 6.083  | 10.3125  | 132 | 46.983  |
| 133 | 9.901  | 10.39063 | 133 | 54.162  |
| 134 | 9.424  | 10.46875 | 134 | 66.921  |
| 135 | 10.675 | 10.54688 | 135 | 80.121  |
| 136 | 9.334  | 10.625   | 136 | 91.681  |
| 137 | 6.487  | 10.70313 | 137 | 100.054 |
| 138 | 4.474  | 10.78125 | 138 | 107.652 |
| 139 | 4.526  | 10.85938 | 139 | 88.802  |
| 140 | 4.514  | 10.9375  | 140 | 63.225  |
| 141 | 1.6    | 11.01563 | 141 | 52.4    |
| 142 | 0.505  | 11.09375 | 142 | 38.697  |
| 143 | 1.022  | 11.17188 | 143 | 30.726  |
| 144 | 1.375  | 11.25    | 144 | 21.058  |
| 145 | 2.015  | 11.32813 | 145 | 14.207  |
| 146 | 0.758  | 11.40625 | 146 | 13.599  |
| 147 | 0.275  | 11.48438 | 147 | 12.944  |
| 148 | 0.911  | 11.5625  | 148 | 13.522  |
| 149 | 0.998  | 11.64063 | 149 | 14.075  |
| 150 | 1.702  | 11.71875 | 150 | 10.461  |
| 151 | 1.93   | 11.79688 | 151 | 13.69   |
| 152 | 2.428  | 11.875   | 152 | 8.007   |
| 153 | 3.45   | 11.95313 | 153 | 8.773   |
| 154 | 3.493  | 12.03125 | 154 | 7.634   |
| 155 | 3.79   | 12.10938 | 155 | 8.427   |
| 156 | 2.758  | 12.1875  | 156 | 9.481   |
| 157 | 6.984  | 12.26563 | 157 | 9.235   |
| 158 | 2.409  | 12.34375 | 158 | 10.429  |
| 159 | 1.778  | 12.42188 | 159 | 9.882   |
| 160 | 0.638  | 12.5     | 160 | 7.397   |
| 161 | 0.545  | 12.57813 | 161 | 7.221   |
| 162 | 0.871  | 12.65625 | 162 | 5.874   |
| 163 | 0.06   | 12.73438 | 163 | 7.421   |
| 164 | 0.124  | 12.8125  | 164 | 8.885   |
| 165 | 0      | 12.89063 | 165 | 8.53    |
| 166 | 0      | 12.96875 | 166 | 6.754   |
| 167 | 0      | 13.04688 | 167 | 8.065   |
| 168 | 0      | 13.125   | 168 | 7.568   |

|     |   |          |     |       |
|-----|---|----------|-----|-------|
| 169 | 0 | 13.20313 | 169 | 6.537 |
| 170 | 0 | 13.28125 | 170 | 7.122 |
| 171 | 0 | 13.35938 | 171 | 7.059 |
| 172 | 0 | 13.4375  | 172 | 4.949 |
| 173 | 0 | 13.51563 | 173 | 5.386 |
| 174 | 0 | 13.59375 | 174 | 7.856 |
| 175 | 0 | 13.67188 | 175 | 6.635 |
| 176 | 0 | 13.75    | 176 | 6     |
| 177 | 0 | 13.82813 | 177 | 5.894 |
| 178 | 0 | 13.90625 | 178 | 5.13  |
| 179 | 0 | 13.98438 | 179 | 4.968 |
| 180 | 0 | 14.0625  | 180 | 5.475 |
| 181 | 0 | 14.14063 | 181 | 5.586 |
| 182 | 0 | 14.21875 | 182 | 5.773 |
| 183 | 0 | 14.29688 | 183 | 7.339 |
| 184 | 0 | 14.375   | 184 | 7.246 |
| 185 | 0 | 14.45313 | 185 | 6.426 |
| 186 | 0 | 14.53125 | 186 | 6     |
| 187 | 0 | 14.60938 | 187 | 5.617 |
| 188 | 0 | 14.6875  | 188 | 4.8   |
| 189 | 0 | 14.76563 | 189 | 4.399 |
| 190 | 0 | 14.84375 | 190 | 4.44  |
| 191 | 0 | 14.92188 | 191 | 3.55  |
| 192 | 0 | 15       | 192 | 4.276 |
| 193 | 0 | 15.07813 | 193 | 6.937 |
| 194 | 0 | 15.15625 | 194 | 6.347 |
| 195 | 0 | 15.23438 | 195 | 5.489 |
| 196 | 0 | 15.3125  | 196 | 5.098 |
| 197 | 0 | 15.39063 | 197 | 5.583 |
| 198 | 0 | 15.46875 | 198 | 4.774 |
| 199 | 0 | 15.54688 | 199 | 5.677 |
| 200 | 0 | 15.625   | 200 | 5.984 |
| 201 | 0 | 15.70313 | 201 | 5.892 |
| 202 | 0 | 15.78125 | 202 | 4.621 |
| 203 | 0 | 15.85938 | 203 | 5.289 |
| 204 | 0 | 15.9375  | 204 | 5.655 |
| 205 | 0 | 16.01563 | 205 | 6.111 |
| 206 | 0 | 16.09375 | 206 | 6.35  |
| 207 | 0 | 16.17188 | 207 | 5.356 |
| 208 | 0 | 16.25    | 208 | 5.266 |
| 209 | 0 | 16.32813 | 209 | 5.278 |
| 210 | 0 | 16.40625 | 210 | 4.749 |
| 211 | 0 | 16.48438 | 211 | 5.229 |
| 212 | 0 | 16.5625  | 212 | 6.289 |
| 213 | 0 | 16.64063 | 213 | 6.626 |
| 214 | 0 | 16.71875 | 214 | 4.621 |
| 215 | 0 | 16.79688 | 215 | 4.148 |
| 216 | 0 | 16.875   | 216 | 6.435 |
| 217 | 0 | 16.95313 | 217 | 5.27  |
| 218 | 0 | 17.03125 | 218 | 6.234 |
| 219 | 0 | 17.10938 | 219 | 5.677 |
| 220 | 0 | 17.1875  | 220 | 4.27  |
| 221 | 0 | 17.26563 | 221 | 4.7   |
| 222 | 0 | 17.34375 | 222 | 5.297 |
| 223 | 0 | 17.42188 | 223 | 5.648 |
| 224 | 0 | 17.5     | 224 | 6.402 |
| 225 | 0 | 17.57813 | 225 | 5.053 |
| 226 | 0 | 17.65625 | 226 | 5.619 |

|     |        |          |     |        |
|-----|--------|----------|-----|--------|
| 227 | 0      | 17.73438 | 227 | 6.363  |
| 228 | 0      | 17.8125  | 228 | 5.235  |
| 229 | 0      | 17.89063 | 229 | 4.975  |
| 230 | 0      | 17.96875 | 230 | 5.997  |
| 231 | 0      | 18.04688 | 231 | 7.265  |
| 232 | 0      | 18.125   | 232 | 7.02   |
| 233 | 0      | 18.20313 | 233 | 5.468  |
| 234 | 0      | 18.28125 | 234 | 5.101  |
| 235 | 0      | 18.35938 | 235 | 7      |
| 236 | 0      | 18.4375  | 236 | 7.311  |
| 237 | 0      | 18.51563 | 237 | 8.243  |
| 238 | 0      | 18.59375 | 238 | 5.836  |
| 239 | 0      | 18.67188 | 239 | 6.29   |
| 240 | 0      | 18.75    | 240 | 3.266  |
| 241 | 0      | 18.82813 | 241 | 5.537  |
| 242 | 0      | 18.90625 | 242 | 6.259  |
| 243 | 0      | 18.98438 | 243 | 7.679  |
| 244 | 0      | 19.0625  | 244 | 6.758  |
| 245 | 0      | 19.14063 | 245 | 5.393  |
| 246 | 0      | 19.21875 | 246 | 9.204  |
| 247 | 0      | 19.29688 | 247 | 7.464  |
| 248 | 0      | 19.375   | 248 | 4.551  |
| 249 | 0      | 19.45313 | 249 | 4.628  |
| 250 | 0      | 19.53125 | 250 | 4.319  |
| 251 | 0      | 19.60938 | 251 | 4.961  |
| 252 | 0      | 19.6875  | 252 | 4.975  |
| 253 | 0      | 19.76563 | 253 | 7.584  |
| 254 | 0      | 19.84375 | 254 | 6.337  |
| 255 | 0      | 19.92188 | 255 | 6.214  |
| 256 | 0      | 20       | 256 | 6.675  |
| 257 | 0      | 20.07813 | 257 | 5.166  |
| 258 | 0      | 20.15625 | 258 | 7.386  |
| 259 | 0.46   | 20.23438 | 259 | 6.074  |
| 260 | 0.787  | 20.3125  | 260 | 5.831  |
| 261 | 0      | 20.39063 | 261 | 8.681  |
| 262 | 0      | 20.46875 | 262 | 9.084  |
| 263 | 0.725  | 20.54688 | 263 | 8.417  |
| 264 | 1.973  | 20.625   | 264 | 8.16   |
| 265 | 0.923  | 20.70313 | 265 | 6.97   |
| 266 | 1.102  | 20.78125 | 266 | 8.535  |
| 267 | 1.364  | 20.85938 | 267 | 8.748  |
| 268 | 1.802  | 20.9375  | 268 | 7.714  |
| 269 | 1.983  | 21.01563 | 269 | 11.379 |
| 270 | 3.495  | 21.09375 | 270 | 12.829 |
| 271 | 3.521  | 21.17188 | 271 | 10.471 |
| 272 | 1.381  | 21.25    | 272 | 11.647 |
| 273 | 3.217  | 21.32813 | 273 | 11.024 |
| 274 | 7.25   | 21.40625 | 274 | 11.533 |
| 275 | 7.447  | 21.48438 | 275 | 11.971 |
| 276 | 4.736  | 21.5625  | 276 | 13.595 |
| 277 | 5.212  | 21.64063 | 277 | 13.3   |
| 278 | 6.907  | 21.71875 | 278 | 14.167 |
| 279 | 10.415 | 21.79688 | 279 | 16.33  |
| 280 | 13.798 | 21.875   | 280 | 16.156 |
| 281 | 9.656  | 21.95313 | 281 | 16.86  |
| 282 | 25.4   | 22.03125 | 282 | 18.4   |
| 283 | 19.609 | 22.10938 | 283 | 20.203 |
| 284 | 25.137 | 22.1875  | 284 | 21.326 |

|     |         |          |     |         |
|-----|---------|----------|-----|---------|
| 285 | 32.786  | 22.26563 | 285 | 23.18   |
| 286 | 27.953  | 22.34375 | 286 | 23.931  |
| 287 | 34.065  | 22.42188 | 287 | 25.241  |
| 288 | 44.732  | 22.5     | 288 | 26.329  |
| 289 | 36.721  | 22.57813 | 289 | 25.255  |
| 290 | 35.298  | 22.65625 | 290 | 26.057  |
| 291 | 33.831  | 22.73438 | 291 | 22.854  |
| 292 | 38.033  | 22.8125  | 292 | 29.316  |
| 293 | 32.654  | 22.89063 | 293 | 25.494  |
| 294 | 47.22   | 22.96875 | 294 | 26.404  |
| 295 | 44.252  | 23.04688 | 295 | 36.988  |
| 296 | 55.671  | 23.125   | 296 | 44.532  |
| 297 | 74.084  | 23.20313 | 297 | 48.884  |
| 298 | 93.639  | 23.28125 | 298 | 56.6    |
| 299 | 159.41  | 23.35938 | 299 | 62.374  |
| 300 | 208.435 | 23.4375  | 300 | 81.03   |
| 301 | 204.262 | 23.51563 | 301 | 98.892  |
| 302 | 216.389 | 23.59375 | 302 | 104.059 |
| 303 | 247.55  | 23.67188 | 303 | 113.59  |
| 304 | 235.592 | 23.75    | 304 | 109.269 |
| 305 | 255     | 23.82813 | 305 | 112.894 |
| 306 | 249.674 | 23.90625 | 306 | 118.452 |
| 307 | 248.057 | 23.98438 | 307 | 136.571 |
| 308 | 229.961 | 24.0625  | 308 | 154.352 |
| 309 | 252.775 | 24.14063 | 309 | 154.897 |
| 310 | 238.364 | 24.21875 | 310 | 148.998 |
| 311 | 247.728 | 24.29688 | 311 | 155.957 |
| 312 | 255     | 24.375   | 312 | 156.419 |
| 313 | 251.612 | 24.45313 | 313 | 125.528 |
| 314 | 209.378 | 24.53125 | 314 | 108.464 |
| 315 | 180.912 | 24.60938 | 315 | 84.69   |
| 316 | 151.591 | 24.6875  | 316 | 63.867  |
| 317 | 102.354 | 24.76563 | 317 | 47.516  |
| 318 | 76.019  | 24.84375 | 318 | 29.787  |
| 319 | 58.097  | 24.92188 | 319 | 23.736  |
| 320 | 54.094  | 25       | 320 | 26.522  |
| 321 | 29.597  | 25.07813 | 321 | 22.554  |
| 322 | 11.201  | 25.15625 | 322 | 21.969  |
| 323 | 9.4     | 25.23438 | 323 | 23.28   |
| 324 | 4.64    | 25.3125  | 324 | 21.42   |
| 325 | 2.956   | 25.39063 | 325 | 19.439  |
| 326 | 2.683   | 25.46875 | 326 | 17.286  |
| 327 | 0.974   | 25.54688 | 327 | 16.961  |
| 328 | 0.387   | 25.625   | 328 | 12.545  |
| 329 | 0       | 25.70313 | 329 | 12.4    |
| 330 | 0       | 25.78125 | 330 | 10.243  |
| 331 | 0       | 25.85938 | 331 | 8.026   |
| 332 | 0       | 25.9375  | 332 | 5.115   |
| 333 | 0       | 26.01563 | 333 | 4.708   |
| 334 | 0       | 26.09375 | 334 | 5.994   |
| 335 | 0       | 26.17188 | 335 | 5.384   |
| 336 | 0       | 26.25    | 336 | 4.584   |
| 337 | 0       | 26.32813 | 337 | 4.054   |
| 338 | 0       | 26.40625 | 338 | 4.904   |
| 339 | 0       | 26.48438 | 339 | 5.625   |
| 340 | 0       | 26.5625  | 340 | 3.413   |
| 341 | 0       | 26.64063 | 341 | 4.686   |
| 342 | 0       | 26.71875 | 342 | 3.567   |

|     |   |          |     |       |
|-----|---|----------|-----|-------|
| 343 | 0 | 26.79688 | 343 | 2.968 |
| 344 | 0 | 26.875   | 344 | 2.13  |
| 345 | 0 | 26.95313 | 345 | 4.052 |
| 346 | 0 | 27.03125 | 346 | 3.464 |
| 347 | 0 | 27.10938 | 347 | 3.254 |
| 348 | 0 | 27.1875  | 348 | 4.149 |
| 349 | 0 | 27.26563 | 349 | 3.101 |
| 350 | 0 | 27.34375 | 350 | 3.521 |
| 351 | 0 | 27.42188 | 351 | 4.48  |
| 352 | 0 | 27.5     | 352 | 3.127 |
| 353 | 0 | 27.57813 | 353 | 2.596 |
| 354 | 0 | 27.65625 | 354 | 2.187 |
| 355 | 0 | 27.73438 | 355 | 2.531 |
| 356 | 0 | 27.8125  | 356 | 2.922 |
| 357 | 0 | 27.89063 | 357 | 3.465 |
| 358 | 0 | 27.96875 | 358 | 3.791 |
| 359 | 0 | 28.04688 | 359 | 4.043 |
| 360 | 0 | 28.125   | 360 | 3.181 |
| 361 | 0 | 28.20313 | 361 | 5.454 |
| 362 | 0 | 28.28125 | 362 | 2.825 |
| 363 | 0 | 28.35938 | 363 | 2.254 |
| 364 | 0 | 28.4375  | 364 | 1.776 |
| 365 | 0 | 28.51563 | 365 | 1.679 |
| 366 | 0 | 28.59375 | 366 | 1.224 |
| 367 | 0 | 28.67188 | 367 | 2.611 |
| 368 | 0 | 28.75    | 368 | 2.888 |
| 369 | 0 | 28.82813 | 369 | 2.575 |
| 370 | 0 | 28.90625 | 370 | 3.831 |
| 371 | 0 | 28.98438 | 371 | 3.267 |
| 372 | 0 | 29.0625  | 372 | 2.443 |
| 373 | 0 | 29.14063 | 373 | 2.022 |
| 374 | 0 | 29.21875 | 374 | 2.386 |
| 375 | 0 | 29.29688 | 375 | 2.323 |
| 376 | 0 | 29.375   | 376 | 2.2   |
| 377 | 0 | 29.45313 | 377 | 2.57  |
| 378 | 0 | 29.53125 | 378 | 3.212 |
| 379 | 0 | 29.60938 | 379 | 3.252 |
| 380 | 0 | 29.6875  | 380 | 2.652 |
| 381 | 0 | 29.76563 | 381 | 2     |
| 382 | 0 | 29.84375 | 382 | 2.599 |
| 383 | 0 | 29.92188 | 383 | 2.679 |
| 384 | 0 | 30       | 384 | 2.468 |
| 385 | 0 | 30.07813 | 385 | 2.732 |
| 386 | 0 | 30.15625 | 386 | 3.845 |
| 387 | 0 | 30.23438 | 387 | 2.236 |
| 388 | 0 | 30.3125  | 388 | 2     |
| 389 | 0 | 30.39063 | 389 | 2.222 |
| 390 | 0 | 30.46875 | 390 | 2.361 |
| 391 | 0 | 30.54688 | 391 | 2.217 |
| 392 | 0 | 30.625   | 392 | 2.817 |
| 393 | 0 | 30.70313 | 393 | 2.055 |
| 394 | 0 | 30.78125 | 394 | 2.205 |
| 395 | 0 | 30.85938 | 395 | 2.942 |
| 396 | 0 | 30.9375  | 396 | 2.752 |
| 397 | 0 | 31.01563 | 397 | 2.021 |
| 398 | 0 | 31.09375 | 398 | 3.132 |
| 399 | 0 | 31.17188 | 399 | 2.809 |
| 400 | 0 | 31.25    | 400 | 2     |

|     |   |          |     |       |
|-----|---|----------|-----|-------|
| 401 | 0 | 31.32813 | 401 | 2.268 |
| 402 | 0 | 31.40625 | 402 | 2.048 |
| 403 | 0 | 31.48438 | 403 | 2.369 |
| 404 | 0 | 31.5625  | 404 | 2.757 |
| 405 | 0 | 31.64063 | 405 | 2.094 |
| 406 | 0 | 31.71875 | 406 | 2.502 |
| 407 | 0 | 31.79688 | 407 | 1.072 |
| 408 | 0 | 31.875   | 408 | 2.023 |
| 409 | 0 | 31.95313 | 409 | 2.803 |
| 410 | 0 | 32.03125 | 410 | 2.641 |
| 411 | 0 | 32.10938 | 411 | 1.155 |
| 412 | 0 | 32.1875  | 412 | 2.74  |
| 413 | 0 | 32.26563 | 413 | 2.136 |
| 414 | 0 | 32.34375 | 414 | 1.605 |
| 415 | 0 | 32.42188 | 415 | 1.861 |
| 416 | 0 | 32.5     | 416 | 2.242 |
| 417 | 0 | 32.57813 | 417 | 2.123 |
| 418 | 0 | 32.65625 | 418 | 1.98  |
| 419 | 0 | 32.73438 | 419 | 1.961 |
| 420 | 0 | 32.8125  | 420 | 1.728 |
| 421 | 0 | 32.89063 | 421 | 2     |
| 422 | 0 | 32.96875 | 422 | 2.156 |
| 423 | 0 | 33.04688 | 423 | 2.6   |
| 424 | 0 | 33.125   | 424 | 2.801 |
| 425 | 0 | 33.20313 | 425 | 1.943 |
| 426 | 0 | 33.28125 | 426 | 2.093 |
| 427 | 0 | 33.35938 | 427 | 2.059 |
| 428 | 0 | 33.4375  | 428 | 2.014 |
| 429 | 0 | 33.51563 | 429 | 2.786 |
| 430 | 0 | 33.59375 | 430 | 2.489 |
| 431 | 0 | 33.67188 | 431 | 2.468 |
| 432 | 0 | 33.75    | 432 | 3.102 |
| 433 | 0 | 33.82813 | 433 | 3.393 |
| 434 | 0 | 33.90625 | 434 | 2.155 |
| 435 | 0 | 33.98438 | 435 | 2.522 |
| 436 | 0 | 34.0625  | 436 | 2.987 |
| 437 | 0 | 34.14063 | 437 | 2.835 |
| 438 | 0 | 34.21875 | 438 | 2.98  |
| 439 | 0 | 34.29688 | 439 | 2.668 |
| 440 | 0 | 34.375   | 440 | 2.255 |
| 441 | 0 | 34.45313 | 441 | 2.016 |
| 442 | 0 | 34.53125 | 442 | 2.557 |
| 443 | 0 | 34.60938 | 443 | 3.001 |
| 444 | 0 | 34.6875  | 444 | 2.53  |
| 445 | 0 | 34.76563 | 445 | 2.855 |
| 446 | 0 | 34.84375 | 446 | 2.944 |
| 447 | 0 | 34.92188 | 447 | 2.008 |
| 448 | 0 | 35       | 448 | 2.132 |
| 449 | 0 | 35.07813 | 449 | 2.353 |
| 450 | 0 | 35.15625 | 450 | 2.618 |
| 451 | 0 | 35.23438 | 451 | 1.956 |
| 452 | 0 | 35.3125  | 452 | 1.745 |
| 453 | 0 | 35.39063 | 453 | 2.268 |
| 454 | 0 | 35.46875 | 454 | 2.987 |
| 455 | 0 | 35.54688 | 455 | 2.629 |
| 456 | 0 | 35.625   | 456 | 3.276 |
| 457 | 0 | 35.70313 | 457 | 2.137 |
| 458 | 0 | 35.78125 | 458 | 2.284 |

|     |   |          |     |       |
|-----|---|----------|-----|-------|
| 459 | 0 | 35.85938 | 459 | 3     |
| 460 | 0 | 35.9375  | 460 | 2.872 |
| 461 | 0 | 36.01563 | 461 | 3.319 |
| 462 | 0 | 36.09375 | 462 | 2.673 |
| 463 | 0 | 36.17188 | 463 | 3.192 |
| 464 | 0 | 36.25    | 464 | 2.898 |
| 465 | 0 | 36.32813 | 465 | 1.167 |
| 466 | 0 | 36.40625 | 466 | 1.839 |
| 467 | 0 | 36.48438 | 467 | 1.539 |
| 468 | 0 | 36.5625  | 468 | 1.424 |
| 469 | 0 | 36.64063 | 469 | 2.334 |
| 470 | 0 | 36.71875 | 470 | 2     |

**Supplementary table 3** The raw data of migration rate of 4T1 cells after incubating with AG and TPP-PEG-PCL@AG for 24h and 36h.

| Control  | Free AG  | TPP-PEG-PCL@AG |
|----------|----------|----------------|
| 21.45994 | 4.259312 | 13.43993       |
| 17.8626  | 1.253227 | 10.18971       |
| 23.50511 | 3.91374  | 14.35859       |
|          |          | 18.4543        |
|          |          | 12.66338       |

**Supplementary table 4** The raw data of relative fluorescence intensity of DCFH-DA prob on 4T1 cells after incubating with AG, PEG-PCL@AG and TPP-PEG-PCL@AG for 48h.

| Control | Free AG | PEG-PCL@AG | TPP-PEG-PCL@AG |
|---------|---------|------------|----------------|
| 36.79   | 142.145 | 67.018     | 84.791         |
| 32.94   | 137.06  | 74.74      | 80.183         |
| 38.07   | 151.32  | 62.07      | 85.31          |

**Supplementary table 5** The raw data of fluorescence proportion of JC-1 monomer on 4T1 cells after incubating with AG, PEG-PCL@AG and TPP-PEG-PCL@AG for 24h.

| Control | Free AG | PEG-PCL@AG | TPP-PEG-PCL@AG |
|---------|---------|------------|----------------|
| 10.1    | 32.7    | 14.9       | 21.2           |
| 11.8    | 32.4    | 17.9       | 25.8           |
| 11.9    | 33.4    | 16.2       | 19.8           |

**Supplementary table 6** The raw data of Caspase-3 protein contents from 4T1 cells after incubating with AG, PEG-PCL@AG and TPP-PEG-PCL@AG for 24h.

| Control  | Free AG  | PEG-PCL@AG  | TPP-PEG-PCL@AG |
|----------|----------|-------------|----------------|
| 23.20414 | 47.96668 | 25.47886188 | 34.83377593    |
| 22.78353 | 51.44067 | 28.0227946  | 42.81181901    |
| 22.3751  | 48.94992 | 28.3866822  | 45.61009481    |

**Supplementary table 7** The raw data of Caspase-9 protein contents from 4T1 cells after incubating with AG, PEG-PCL@AG and TPP-PEG-PCL@AG for 24h.

| Control  | Free AG  | PEG-PCL@AG | TPP-PEG-PCL@AG |
|----------|----------|------------|----------------|
| 20.86643 | 35.21023 | 28.69985   | 31.68717       |
| 20.75072 | 37.39335 | 35.06435   | 33.13963       |
| 20.88245 | 42.58155 | 35.84966   | 38.25397       |
